# Supplementary material
Source: HighWire-hosted journal article supplement (https://bmjopen.bmj.com/content/7/3/e012794)
Supplement: inline-supplementary-material-1 [file inline-supplementary-material-1.pdf]

# Fragebogen zum Blockpraktikum Allgemeinmedizin

Sie haben gerade das Blockpraktikum der Allgemeinmedizin in einer Lehrpraxis absolviert. Bitte helfen Sie uns das Praktikum qualitativ zu optimieren

In welcher Praxis waren Sie?.....

Schwerpunkte/Zusatzbezeichnungen:.....

## 1. Angaben des Studierenden:

1.1 Geschlecht (m/w): [.....]

1.2 Alter: [.....]

1.3 Wie hoch ist Ihre derzeitige Motivation für das Studium? (1= sehr hoch; 5 = sehr gering)

|   |   |   |   |   |
|---|---|---|---|---|
| 1 | 2 | 3 | 4 | 5 |
|---|---|---|---|---|

1.4 Haben Sie vor Ihrem Studium berufliche Erfahrungen gesammelt?

Ich habe eine Berufsausbildung absolviert , welche:.....

Ich habe eine Zusatzausbildung , welche:.....

Ich habe medizinische Vorkenntnisse , durch:.....

Ich kam direkt von der Schule

Sonstiges:.....

1.5 Welche Fachrichtung streben Sie an?.....

1.6 Sind Ihre Eltern/Geschwister/ in einem medizinischen Beruf tätig?

Krankenpflege/Altenpflege

Heilpraktiker

Apotheker

Physiotherapie/Krankengymnastik

Arzt

welche Fachrichtung:.....

Eigene Praxis

Gemeinschaftspraxis

Krankenhaus

Sonstiges:.....

## 2. Patienten mit welcher Altersstruktur haben Sie in der Praxis hauptsächlich erlebt?

Alter (in Jahren)      0 - 20 ;    20 - 50 ;    50 - 80 ;    >80

## 3. Praxisauswahl:

3.1 Haben Sie sich die Praxis ausgewählt   
oder sind Sie zugeteilt worden

3.2 Haben Sie die Schwerpunkte der Praxis besonders interessiert? ja , teils , nein

3.3 War die Praxis von Ihrer Wohnung aus besonders gut zu erreichen? ja , nein

## 4. Was waren Ihre Tätigkeiten:

4.1 (Mehrfachnennungen sind möglich)

|                                                      |                                                       |
|------------------------------------------------------|-------------------------------------------------------|
| Beobachten/ Zuhören <input type="checkbox"/>         | EKG befunden <input type="checkbox"/>                 |
| Diskussion der Fälle <input type="checkbox"/>        | Spritzen und Braunülen legen <input type="checkbox"/> |
| Therapiekonzepte entwickeln <input type="checkbox"/> | Wundversorgung <input type="checkbox"/>               |
| Anamnese <input type="checkbox"/>                    | Sonstiges:                                            |
| Körperliche Untersuchungen <input type="checkbox"/>  |                                                       |
| Blutabnahme <input type="checkbox"/>                 |                                                       |
| Sonographie <input type="checkbox"/>                 |                                                       |

4.2 Bei wie vielen Patienten haben Sie eine ausführliche Anamnese erhoben? [.....]  
und eine Untersuchung durchgeführt? .....

4.3 Bei wie vielen Hausbesuchen waren Sie beteiligt? [.....]

4.4 Wie oft haben Sie selbstständig am Patienten gearbeitet? (1 = immer; 5 = nie)

|   |   |   |   |   |
|---|---|---|---|---|
| 1 | 2 | 3 | 4 | 5 |
|---|---|---|---|---|

4.5 Wie haben die Patienten auf Ihre Anwesenheit reagiert? (1 = sehr interessiert; 5 = total ablehnend)

|   |   |   |   |   |
|---|---|---|---|---|
| 1 | 2 | 3 | 4 | 5 |
|---|---|---|---|---|

## 5. Betreuung von Schwerstkranken und Sterbenden:

5.1 Waren Sie in die Betreuung von Schwerstkranken und Sterbenden eingebunden?  
nein  (bitte weiter mit PKT. 6.)  
ja

5.2 Wie belastend fanden Sie diese Erfahrung? (1 = nicht belastend; 5 = sehr belastend)

|   |   |   |   |   |
|---|---|---|---|---|
| 1 | 2 | 3 | 4 | 5 |
|---|---|---|---|---|

5.3 Halten Sie diese Erfahrung für eine *absolut notwendige vorbereitende Maßnahme* für Ihre spätere ärztliche Tätigkeit? (1 = absolut notwendig; 5 = unnötig)

|   |   |   |   |   |
|---|---|---|---|---|
| 1 | 2 | 3 | 4 | 5 |
|---|---|---|---|---|

5.4 Was waren Ihre Empfindungen?  
( 1 = trifft zu; 5 = trifft nicht zu )

|       |                                                                                  |   |   |   |   |   |
|-------|----------------------------------------------------------------------------------|---|---|---|---|---|
| 5.4.1 | Mir wurden schwere Erkrankungen und der Tod als Bestandteil des Lebens bewusster | 1 | 2 | 3 | 4 | 5 |
| 5.4.2 | Ich habe mich um die Angehörigen gesorgt                                         | 1 | 2 | 3 | 4 | 5 |
| 5.4.3 | Ich hatte Angst, dass der Patient leiden muss                                    | 1 | 2 | 3 | 4 | 5 |
| 5.4.4 | Ich spürte die Angst vor meinem eigenen Tod                                      | 1 | 2 | 3 | 4 | 5 |
| 5.4.5 | Ich hatte Angst, mit dem Patienten zu sprechen                                   | 1 | 2 | 3 | 4 | 5 |
| 5.4.6 | Ich habe rational über die weiteren Schritte der Behandlung nachdenken können    | 1 | 2 | 3 | 4 | 5 |
| 5.4.7 | Sonstiges:                                                                       |   |   |   |   |   |

## 6. Betreuung in der Praxis:

6.1 Waren Sie in einer Gemeinschaftspraxis: nein  (weiter mit Frage 6.4)

ja ;

6.2 Wie viele KollegInnen hatte die Praxis? [.....]

6.3 Wurden Sie immer von *einem Kollegen* betreut  oder *wechselte es*  ?

6.4 Welchen Eindruck haben Sie von Ihrem Lehrarzt?  
( 1 = trifft voll zu; 5 = trifft eher nicht zu )

|        |                                                                                |   |   |   |   |   |
|--------|--------------------------------------------------------------------------------|---|---|---|---|---|
| 6.4.1  | Freundlich empathisches Verhalten                                              | 1 | 2 | 3 | 4 | 5 |
| 6.4.2  | Er wirkte fachlich sehr kompetent                                              | 1 | 2 | 3 | 4 | 5 |
| 6.4.3  | Der Arzt hat sich angemessen viel Zeit genommen für den einzelnen Patienten    | 1 | 2 | 3 | 4 | 5 |
| 6.4.4  | Kommunikation in verständlicher /anschaulicher Sprache                         | 1 | 2 | 3 | 4 | 5 |
| 6.4.5  | Gute nonverbale Kommunikation (Blickkontakt, Mimik, Tonfall, Körperkontakt...) | 1 | 2 | 3 | 4 | 5 |
| 6.4.6  | Der Arzt respektiert die Patienten-Autonomie (z.B. bei Non- Compliance)        | 1 | 2 | 3 | 4 | 5 |
| 6.4.7  | Strukturierte Arbeitsabläufe und Praxisorganisation                            | 1 | 2 | 3 | 4 | 5 |
| 6.4.8  | Sorgfältiger Umgang mit der ärztlichen Schweigepflicht                         | 1 | 2 | 3 | 4 | 5 |
| 6.4.9  | Viel Verständnis für psychosomatische Krankheitszusammenhänge                  | 1 | 2 | 3 | 4 | 5 |
| 6.4.10 | Wertschätzendes Verhalten gegenüber Patienten und Mitarbeitern                 | 1 | 2 | 3 | 4 | 5 |
| 6.4.11 | Hohe Berufszufriedenheit des Arztes                                            | 1 | 2 | 3 | 4 | 5 |
| 6.4.12 | Sonstiges:                                                                     |   |   |   |   |   |

## 7. Bewerten Sie Ihr Verhältnis zum Lehrarzt:

(1 = bester Wert; 5 = schlechtester Wert)

7.1 Wie präzise war die Anleitung durch den Arzt?

|   |   |   |   |   |
|---|---|---|---|---|
| 1 | 2 | 3 | 4 | 5 |
|---|---|---|---|---|

7.2 Wie gut wurden die Patientenfälle anschließend mit dem Arzt erörtert?

|   |   |   |   |   |
|---|---|---|---|---|
| 1 | 2 | 3 | 4 | 5 |
|---|---|---|---|---|

7.3 Wie erfreulich war die Zusammenarbeit mit dem Arzt?

|   |   |   |   |   |
|---|---|---|---|---|
| 1 | 2 | 3 | 4 | 5 |
|---|---|---|---|---|

7.4 Wie gut waren sie in den Praxisablauf integriert?

|   |   |   |   |   |
|---|---|---|---|---|
| 1 | 2 | 3 | 4 | 5 |
|---|---|---|---|---|

7.5 Wie selbstständig haben sie gearbeitet?

|   |   |   |   |   |
|---|---|---|---|---|
| 1 | 2 | 3 | 4 | 5 |
|---|---|---|---|---|

7.6 Wie präzise wurden ihre Fragen beantwortet?

|   |   |   |   |   |
|---|---|---|---|---|
| 1 | 2 | 3 | 4 | 5 |
|---|---|---|---|---|

7.7 Sonstiges:.....

7.8 War die Beziehung .....

eher kollegial

eine typische Lehrer/Schüler-Beziehung

andere

welche:.....

## 8. Bewertung des Praktikums:

(1 = bester Wert; 5 = schlechtester Wert)

8.1 Fühlten Sie sich durch die Universität auf dieses Praktikum gut vorbereitet?

|   |   |   |   |   |
|---|---|---|---|---|
| 1 | 2 | 3 | 4 | 5 |
|---|---|---|---|---|

Fühlten Sie sich.....

8.2 überfordert zeitlich , fachlich , emotional

Sonstige:.....

8.3 unterfordert zeitlich , fachlich , emotional

Sonstige:.....

8.4 angemessen gefordert  ?

Lehrziel: **Das Praktikum soll das Gelernte in der konkreten Patienten-anwendung und unter den konkreten Arbeitsbedingungen einer Allgemeinpraxis erfassbar machen und vertiefen**

8.5 Haben Sie von diesem Praktikum, unter Berücksichtigung des Lehrzieles, für Ihre spätere ärztliche Tätigkeit profitiert?  
( 1 = ja, sehr ; 5 = überhaupt nicht )

|   |   |   |   |   |
|---|---|---|---|---|
| 1 | 2 | 3 | 4 | 5 |
|---|---|---|---|---|

8.6 Haben Sie einen Einblick in die Arbeit eines Allgemeinarztes bekommen?

|   |   |   |   |   |
|---|---|---|---|---|
| 1 | 2 | 3 | 4 | 5 |
|---|---|---|---|---|

8.7 Haben Sie einen Einblick in den organisatorischen Ablauf einer allgemeinmedizinischen Praxis bekommen?

|   |   |   |   |   |
|---|---|---|---|---|
| 1 | 2 | 3 | 4 | 5 |
|---|---|---|---|---|

8.8 Hat sich Ihre Einstellung zum Berufsbild des Hausarztes durch das Blockpraktikum in der Lehrpraxis verändert?  
ja ; nein

8.9 Wie groß war Ihr Interesse vor dem Praktikum?  
(1= sehr groß; 5= sehr gering)

|   |   |   |   |   |
|---|---|---|---|---|
| 1 | 2 | 3 | 4 | 5 |
|---|---|---|---|---|

8.10 Wie groß ist Ihr Interesse nach dem Praktikum?  
(1= sehr groß; 5= sehr gering)

|   |   |   |   |   |
|---|---|---|---|---|
| 1 | 2 | 3 | 4 | 5 |
|---|---|---|---|---|

8.11 Was hat sich konkret geändert und warum?.....  
.....  
.....

8.12 Gibt es etwas, was Sie konkret anders machen möchten und warum?.....  
.....  
.....

8.13 Könnten Sie sich vorstellen einen Teil Ihrer PJ – Ausbildung in einer akademischen Lehrpraxis für Allgemeinmedizin zu absolvieren?

ja , nein , weiß noch nicht

8.14 Könnten Sie sich vorstellen Facharzt für Allgemein- und Innere Medizin zu werden?

ja , nein , weiß noch nicht

### 9. Praktikumsorganisation

|     |                                                          |   |   |   |   |   |
|-----|----------------------------------------------------------|---|---|---|---|---|
| 9.1 | Wie angemessen finden sie den Zeitrahmen (14 Tage)?      | 1 | 2 | 3 | 4 | 5 |
| 9.2 | Wie angemessen finden sie den Zeitpunkt (4. klin. Sem.)? | 1 | 2 | 3 | 4 | 5 |
| 9.3 | Wie war die Betreuung?                                   | 1 | 2 | 3 | 4 | 5 |
| 9.4 | Wie gut konnten Sie Gelerntes anwenden?                  | 1 | 2 | 3 | 4 | 5 |
| 9.5 | Wie waren die Patientenkontakte?                         | 1 | 2 | 3 | 4 | 5 |
| 9.6 | Wie war die Organisation?                                | 1 | 2 | 3 | 4 | 5 |
| 9.7 | Hat es Ihnen Spaß gemacht?                               | 1 | 2 | 3 | 4 | 5 |

### 10. Wie bewerten Sie Ihre eigenen Fähigkeiten?

(1 = bester Wert; 5 = schlechtester Wert)

|      |                                                       |   |   |   |   |   |
|------|-------------------------------------------------------|---|---|---|---|---|
| 10.1 | Praktische Fertigkeiten bei Anamnese und Untersuchung | 1 | 2 | 3 | 4 | 5 |
| 10.2 | Fachwissen                                            | 1 | 2 | 3 | 4 | 5 |
| 10.3 | Strukturiertes Arbeiten                               | 1 | 2 | 3 | 4 | 5 |
| 10.4 | Selbstständiges Arbeiten                              | 1 | 2 | 3 | 4 | 5 |
| 10.5 | Fachübergreifendes Denken                             | 1 | 2 | 3 | 4 | 5 |
| 10.6 | Fähigkeit zur Teamarbeit                              | 1 | 2 | 3 | 4 | 5 |
| 10.7 | Kommunikationsfähigkeit                               | 1 | 2 | 3 | 4 | 5 |
| 10.8 | Motivation                                            | 1 | 2 | 3 | 4 | 5 |
| 10.9 | Pünktlichkeit                                         | 1 | 2 | 3 | 4 | 5 |

10.10 Konnten Sie diese Fähigkeiten durch das Praktikum verbessern? ja , nein

10.11 Bei nein: (Mehrfachnennungen sind möglich)

Zu wenig Zeit

Keine adäquate Betreuung

Zu wenig selbstständiges Arbeiten

Zu viel in zu kurzer Zeit

Sonstige Gründe:.....

11. Welche Gesamtnote geben Sie dem Praktikum ( 1= sehr gut; 5= mangelhaft)

|   |   |   |   |   |
|---|---|---|---|---|
| 1 | 2 | 3 | 4 | 5 |
|---|---|---|---|---|

Vielen Dank für Ihre Hilfe

Stand: 10/2007
